# Supplementary material for: Compact TiO2 films with sandwiched Ag nanoparticles as electron-collecting layer in planar type perovskite solar cells: improvement in efficiency and stability
Source: Royal Society of Chemistry journal article supplement (doi:10.1039/c7ra13744c), 2018-01-01
Supplement: c7ra13744c1.pdf [file c7ra13744c1.pdf]

## Electronic Supplementary Information

# Compact TiO<sub>2</sub> Films with Sandwiched Ag Nanoparticles as Electron-Collecting Layer in Planar Type Perovskites Solar Cells: Improvement in Efficiency and Stability

Seid Yimer Abate,<sup>abc</sup> Wen-Ti Wu,<sup>a</sup> Someshwar Pola<sup>d\*</sup> and Yu-Tai Tao<sup>a\*</sup>

<sup>a</sup>Institute of Chemistry, Academia Sinica, Nankang, Taipei 115, Taiwan. Email: ytt@gate.sinica.edu.tw

<sup>b</sup>Taiwan International Graduate Program (TIGP), Sustainable Chemical Science and Technology (SCST), Academia Sinica, Taipei, Taiwan.

<sup>c</sup>Department of Applied Chemistry, National Chiao Tung University, Hsinchu, Taiwan.

<sup>d</sup>Department of Chemistry, Nizam College, Osmania University, Hyderabad, India

### Preparation of ETL Layer by Spinning Process

A three-stage spinning procedure was adopted for both c-TiO<sub>2</sub> layer and AgNO<sub>3</sub> layer in that the spin rate was programed such that first spinning at 800 rpm for 10 s, followed by spinning at 1000 rpm for 10 s and then 2000 rpm for 40 s.<sup>1</sup>

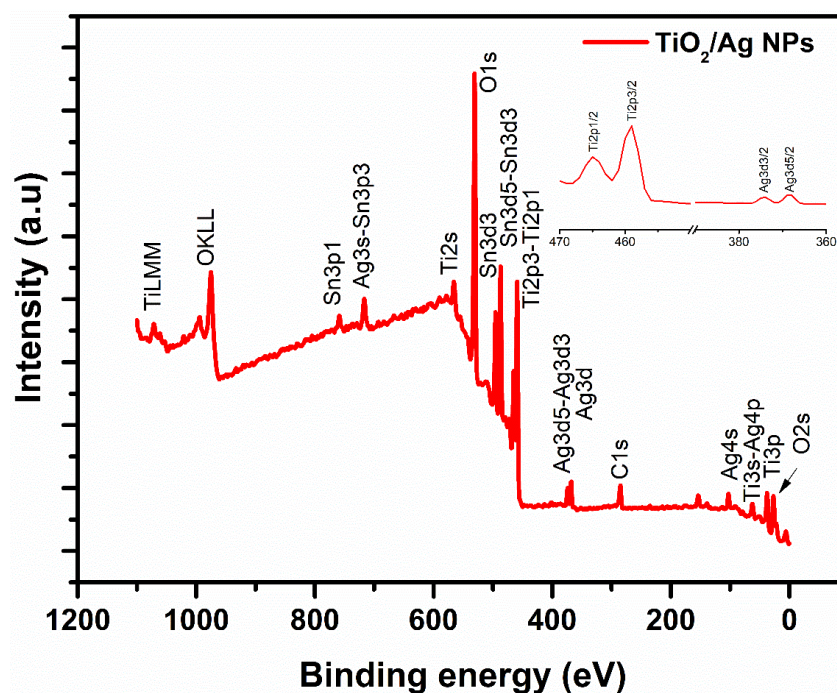

Fig. S1 XPS spectra of c-TiO<sub>2</sub>/Ag NPs on FTO substrate. The inset shows the binding energies of Ag 3d<sub>5/2</sub> and 3d<sub>3/2</sub> at 368.0 and 374.1 eV respectively

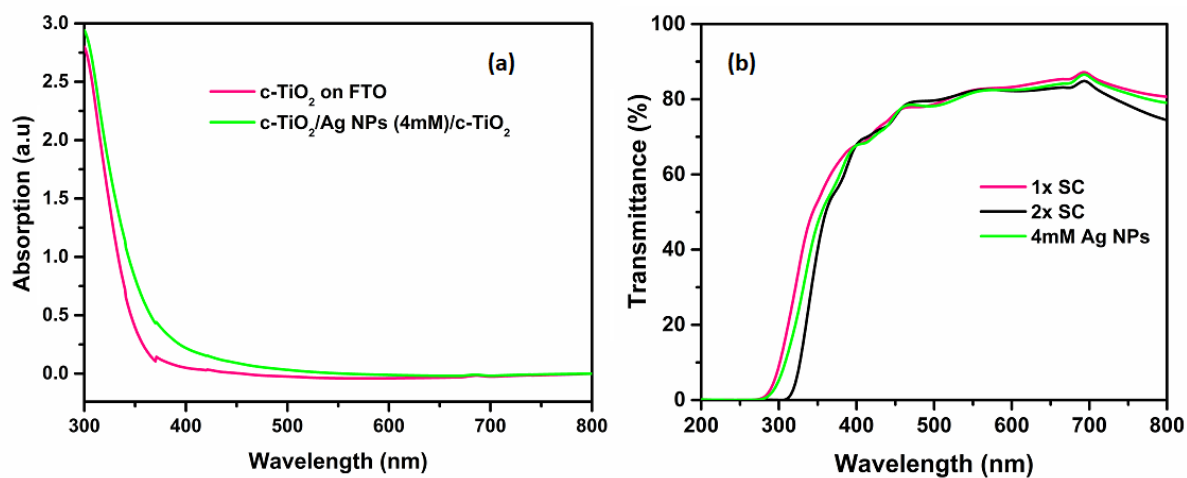

Fig. S2 UV-Vis absorption spectra of pristine c-TiO<sub>2</sub> and c-TiO<sub>2</sub>/Ag NPs (4mM)/c-TiO<sub>2</sub> on FTO substrate (a), optical transmittance spectra for 1x SC, 2x SC and 4mM Ag NPs ETLs (b)

Table S1 Reverse and forward photovoltaic performance parameters of planar PSCs prepared on different electron transporting layers (ETLs)

| ETL   | Sweep Direction | Voc (V) | Jsc (mAcm <sup>-2</sup> ) | FF (%) | PCE(%) | Hysteresis Index |
|-------|-----------------|---------|---------------------------|--------|--------|------------------|
| 1X SC | R               | 0.98    | 18.47                     | 68.20  | 12.35  | 0.571            |
|       | FW              | 0.89    | 15.88                     | 41.06  | 5.80   |                  |
| 2X SC | R               | 0.98    | 21.95                     | 70.51  | 15.17  | 0.125            |
|       | FW              | 0.98    | 21.62                     | 68.87  | 14.59  |                  |
| 4mM   | R               | 1.01    | 23.36                     | 73.11  | 17.25  | 0.013            |
|       | FW              | 1.00    | 23.30                     | 71.96  | 16.77  |                  |
| 12mM  | R               | 0.99    | 22.52                     | 71.41  | 15.92  | 0.045            |
|       | FW              | 1.00    | 23.26                     | 66.13  | 15.38  |                  |
| 20mM  | R               | 1.00    | 22.62                     | 67.44  | 15.26  | 0.050            |
|       | FW              | 0.98    | 21.46                     | 71.44  | 15.02  |                  |

$$\text{Hysteresis index} = \frac{J_{RS}(0.8V_{oc}) - J_{FS}(0.8V_{oc})}{J_{RS}(0.8V_{oc})}$$

#### Hysteresis calculation

The hysteresis index is calculated from the J-V curve. Reverse and forward J<sub>sc</sub> were taken at 0.8V<sub>oc</sub> in calculation.<sup>2</sup>

**$R_{sh}$  and  $R_s$  measurements**

Shunting resistance ( $R_{sh}$ ) is a measure of resistance to current loss, but series resistance ( $R_s$ ) is a resistance to current flow. In this study we calculated  $R_{sh}$  and  $R_s$  by using slope method from the J-V curve of the devices near to the values of  $J_{sc}$  and  $V_{oc}$  respectively.<sup>3</sup>

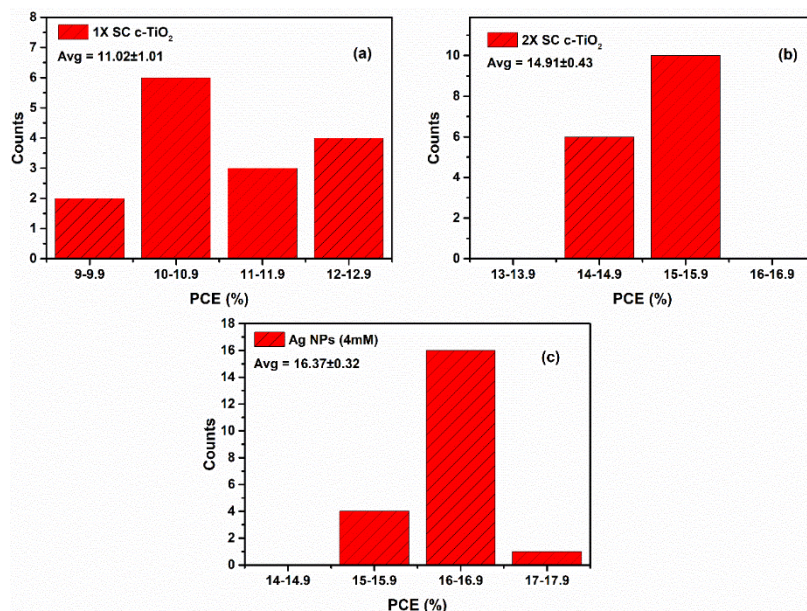

Fig. S3 Histogram comparison of PCE of devices prepared using 1X SC, 2X SC and 2XSC Ag NPs (4mM) ETLs

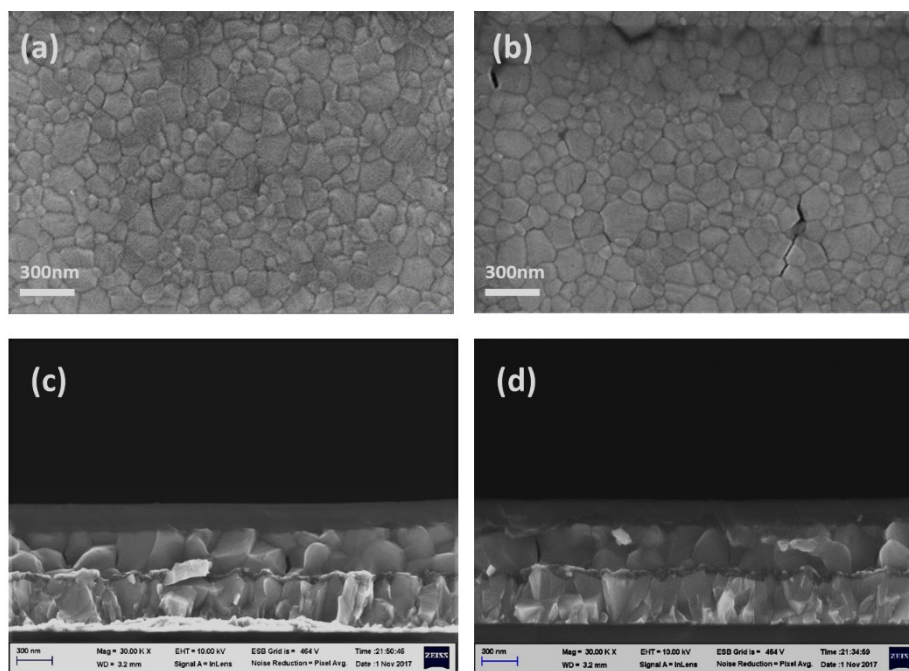

Fig. S4 Top-view SEM images of perovskite films on (a) 2XSC Ag NPs (12mM) and (b) 2XSC Ag NPs (20mM) TiO<sub>2</sub> surface, cross-section images of (c) FTO/1X SC/perovskite/Spiro-OMeTAD/Ag and (d) FTO/2X SC/perovskite/Spiro-OMeTAD/Ag

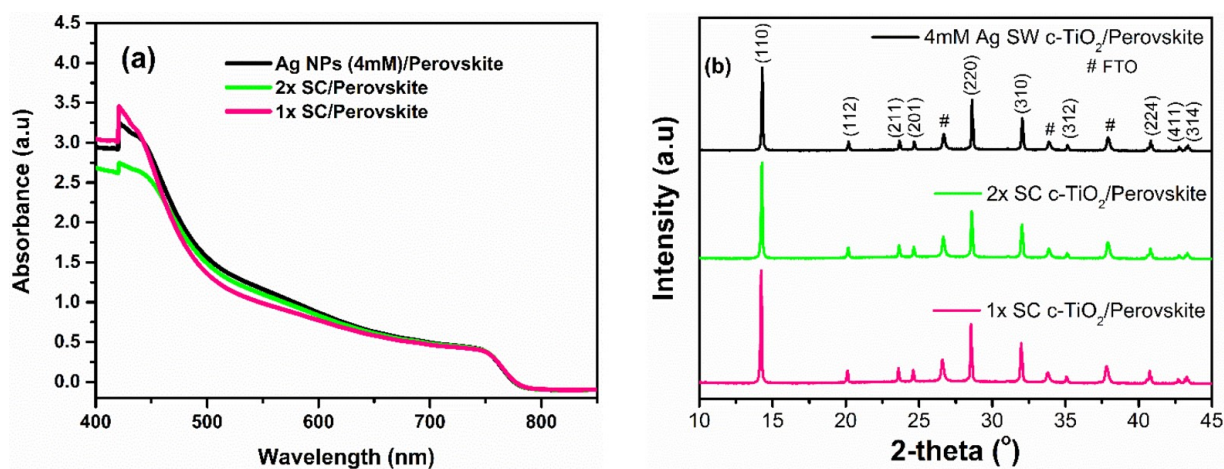

Fig. S5 (a) UV-Vis absorption spectra of perovskite film and (b) Powder XRD of perovskite film prepared on 1X SC, 2X SC and Ag<sub>2</sub>XSC NPs (4mM) ETL

Table S2 Standard deviation of photovoltaic parameters for pristine (1X SC ETL)-based planar perovskite solar cells.

| Device No. | Voc (V)   | Jsc (mAcm <sup>-2</sup> ) | FF (%)     | PCE (%)    |
|------------|-----------|---------------------------|------------|------------|
| 1          | 0.94      | 16.16                     | 66.96      | 10.17      |
| 2          | 0.94      | 16.68                     | 66.59      | 10.44      |
| 3          | 0.99      | 14.05                     | 67.91      | 9.44       |
| 4          | 0.94      | 16.19                     | 68.49      | 10.42      |
| 5          | 0.95      | 17.97                     | 66.72      | 11.7       |
| 6          | 0.98      | 18.47                     | 68.2       | 12.35      |
| 7          | 0.96      | 15.05                     | 71.54      | 10.33      |
| 8          | 0.95      | 18.73                     | 67.92      | 12.08      |
| 9          | 0.95      | 17.81                     | 72.66      | 12.29      |
| 10         | 0.94      | 17.35                     | 71.37      | 11.64      |
| 11         | 0.93      | 17.50                     | 72.04      | 11.73      |
| 12         | 0.94      | 17.30                     | 73.86      | 12.01      |
| 13         | 0.95      | 17.14                     | 66.09      | 10.76      |
| 14         | 0.97      | 14.63                     | 65.93      | 9.35       |
| 15         | 0.96      | 16.42                     | 67.22      | 10.59      |
| Average    | 0.95±0.02 | 16.76±1.37                | 68.90±2.64 | 11.02±1.01 |

**Table S3** Standard deviation of photovoltaic parameters for 2X SC ETL-based planar perovskite solar cells.

| Device No. | Voc (V)   | Jsc (mAcm <sup>-2</sup> ) | FF (%)     | PCE (%)    |
|------------|-----------|---------------------------|------------|------------|
| 1          | 1.00      | 21.70                     | 69.66      | 15.12      |
| 2          | 1.00      | 21.57                     | 70.7       | 15.25      |
| 3          | 1.00      | 22.49                     | 68.00      | 15.30      |
| 4          | 0.98      | 21.36                     | 67.73      | 14.18      |
| 5          | 0.98      | 21.23                     | 70.06      | 14.58      |
| 6          | 0.98      | 21.95                     | 70.51      | 15.17      |
| 7          | 0.99      | 21.64                     | 70.29      | 15.06      |
| 8          | 0.98      | 21.67                     | 71.44      | 15.18      |
| 9          | 0.98      | 21.59                     | 71.84      | 15.20      |
| 10         | 0.99      | 21.67                     | 67.12      | 14.40      |
| 11         | 0.99      | 22.83                     | 67.56      | 15.27      |
| 12         | 0.98      | 21.36                     | 67.56      | 14.15      |
| 13         | 0.99      | 22.07                     | 69.64      | 15.22      |
| 14         | 0.98      | 21.45                     | 69.49      | 14.61      |
| 15         | 0.98      | 21.34                     | 69.4       | 14.52      |
| 16         | 0.99      | 22.77                     | 68.33      | 15.40      |
| Average    | 0.99±0.01 | 21.79±0.50                | 69.33±1.46 | 14.91±0.43 |

**Table S4** Standard deviation of photovoltaic parameters for Ag NPs (4mM)-embedded ETL-based planar perovskite solar cells.

| Device No. | Voc (V)   | Jsc (mAcm <sup>-2</sup> ) | FF (%)     | PCE (%)    |
|------------|-----------|---------------------------|------------|------------|
| 1          | 1.00      | 22.57                     | 71.47      | 16.13      |
| 2          | 0.99      | 22.47                     | 73.05      | 16.25      |
| 3          | 0.99      | 22.35                     | 73.54      | 16.27      |
| 4          | 0.99      | 22.4                      | 74.32      | 16.48      |
| 5          | 0.99      | 22.38                     | 72.16      | 15.99      |
| 6          | 1.01      | 22.72                     | 70.09      | 16.08      |
| 7          | 1.01      | 23.42                     | 68.92      | 16.30      |
| 8          | 1.01      | 23.35                     | 69.8       | 16.46      |
| 9          | 1.01      | 23.36                     | 73.11      | 17.25      |
| 10         | 1.00      | 23.35                     | 70.41      | 16.44      |
| 11         | 1.00      | 23.21                     | 70.95      | 16.47      |
| 12         | 1.01      | 22.71                     | 72.42      | 16.61      |
| 13         | 0.99      | 22.50                     | 73.8       | 16.44      |
| 14         | 1.00      | 23.17                     | 68.5       | 15.87      |
| 15         | 1.00      | 22.79                     | 70.00      | 15.95      |
| 16         | 1.00      | 23.22                     | 68.84      | 15.98      |
| 17         | 0.98      | 23.29                     | 72.46      | 16.54      |
| 18         | 1.01      | 23.32                     | 69.16      | 16.29      |
| 19         | 1.01      | 22.6                      | 72.59      | 16.57      |
| 20         | 1.01      | 22.65                     | 73.05      | 16.71      |
| 21         | 1.01      | 23.33                     | 70.78      | 16.67      |
| Average    | 1.00±0.01 | 22.91±0.39                | 71.40±1.81 | 16.37±0.32 |

**Table S5** Standard deviation of photovoltaic parameters for Ag NPs (12mM)-embedded ETL-based planar perovskite solar cells

| Device No. | Voc (V)   | Jsc (mAcm <sup>-2</sup> ) | FF (%)     | PCE (%)    |
|------------|-----------|---------------------------|------------|------------|
| 1          | 0.99      | 22.63                     | 68.05      | 15.24      |
| 2          | 1.00      | 22.46                     | 65.50      | 14.71      |
| 3          | 0.99      | 22.52                     | 71.41      | 15.92      |
| 4          | 0.98      | 22.77                     | 67.37      | 15.03      |
| 5          | 1.00      | 21.32                     | 70.20      | 14.96      |
| 6          | 1.00      | 23.15                     | 67.43      | 15.61      |
| 7          | 1.00      | 22.68                     | 66.84      | 15.16      |
| 8          | 0.97      | 21.21                     | 69.61      | 14.32      |
| 9          | 1.00      | 22.48                     | 66.11      | 14.86      |
| 10         | 0.99      | 22.31                     | 65.29      | 14.42      |
| 11         | 0.99      | 23.49                     | 66.25      | 15.41      |
| 12         | 1.00      | 22.52                     | 67.54      | 15.21      |
| 13         | 0.97      | 22.11                     | 67.91      | 14.56      |
| 14         | 1.00      | 22.30                     | 67.35      | 15.01      |
| 15         | 0.97      | 22.06                     | 70.53      | 15.09      |
| Average    | 0.99±0.01 | 22.40±0.59                | 67.83±1.85 | 15.03±0.43 |

**Table S6** Standard deviation of photovoltaic parameters for Ag NPs (20mM)-embedded ETL-based planar perovskite solar cells

| Device No. | Voc (V)   | Jsc (mAcm <sup>-2</sup> ) | FF (%)     | PCE (%)    |
|------------|-----------|---------------------------|------------|------------|
| 1          | 0.97      | 22.18                     | 68.91      | 14.83      |
| 2          | 0.99      | 20.99                     | 71.88      | 14.94      |
| 3          | 0.98      | 19.86                     | 69.97      | 13.62      |
| 4          | 0.99      | 21.75                     | 64.27      | 13.84      |
| 5          | 0.99      | 21.71                     | 64.78      | 13.92      |
| 6          | 1.00      | 21.16                     | 70.96      | 15.02      |
| 7          | 0.98      | 19.78                     | 71.07      | 13.78      |
| 8          | 0.97      | 22.45                     | 68.55      | 14.93      |
| 9          | 0.98      | 19.90                     | 68.04      | 13.27      |
| 10         | 1.01      | 20.55                     | 67.82      | 14.08      |
| 11         | 0.99      | 19.90                     | 66.78      | 13.16      |
| 12         | 1.00      | 20.90                     | 71.57      | 14.95      |
| 13         | 1.00      | 22.62                     | 67.44      | 15.26      |
| 14         | 0.98      | 19.80                     | 70.76      | 13.73      |
| 15         | 0.99      | 21.35                     | 65.82      | 13.91      |
| 16         | 0.99      | 22.66                     | 65.01      | 14.58      |
| Average    | 0.99±0.01 | 21.09±1.06                | 67.38±2.54 | 14.23±0.68 |

**Notes and references**

- 1 N. Ahn, D.-Y. Son, I.-H. Jang, S. M. Kang, M. Choi and N.-G. Park, *J. Am. Chem. Soc.*, 2015, **137**, 8696.
- 2 H.-S. Kim and N.-G. Park, *The journal of physical chemistry letters*, 2014, **5**, 2927.
- 3 H.-K. Lin, Y.-W. Su, H.-C. Chen, Y.-J. Huang and K.-H. Wei, *ACS Appl. Mater. Interfaces*, 2016, **8**, 24603.
